# Supplementary material
Source: publisher figshare collection journal article supplement (https://acs.figshare.com/ndownloader/files/4637770)
Supplement: Supplementary file 1 [file 4637770]

# Stereocontrolled Assembly of the C3/C3' Dideoxy Core of Lomaiviticin A/B and Congeners

Weidong Zhang, Aleksandra Baranczak and Gary A. Sulikowski\*

*Department of Chemistry, Institute of Chemical Biology, Vanderbilt University, Nashville, Tennessee 37235.*

## Supplementary Material

**General Methods:** Unless indicated, all commercial reagents were used as received without further purification. All non-aqueous reactions were carried out under an argon atmosphere using glassware that had been dried overnight at 120 °C and cooled to room temperature under an argon atmosphere. Tetrahydrofuran was distilled over Na/benzophenone, while dichloromethane, toluene, diethyl ether and dimethylformamide were dried using an MBRAUN-SPS solvent drying system. Benzene was distilled from calcium hydride and stored over 4 Å molecular sieves. All solvents were determined to contain less than 50 ppm water by Karl Fisher coulometric moisture analysis. Reactions were monitored by thin-layer chromatography (TLC) using 0.25-mm E. Merck pre-coated silica gel plates. Visualization was accomplished with UV light and aqueous ceric ammonium molybdate solution or potassium permanganate stain followed by charring on a hot-plate. Flash chromatography was performed using silica gel 60 (particle size 230-400 mesh) with the indicated solvent system. Yields refer to chromatographically and spectroscopically pure compounds unless otherwise stated. Proton nuclear magnetic resonance ( $^1\text{H}$  NMR) spectra and carbon-13 ( $^{13}\text{C}$  NMR) spectra were recorded on a 300, 400 or 500, 600 MHz spectrometer at ambient temperature.  $^1\text{H}$  and  $^{13}\text{C}$  NMR data are reported as  $\delta$  values relative to tetramethylsilane  $\delta$  0 ppm or residual non-deuterated solvent  $\delta$  7.26 ppm for  $\text{CHCl}_3$ ,  $\delta$  7.15 ppm for  $\text{C}_6\text{D}_6$ ,  $\delta$  2.04 for  $(\text{CD}_3)_2\text{CO}$ . For  $^{13}\text{C}$  spectra, chemical shifts are reported relative to the  $\delta$  77.23 ppm resonance of  $\text{CDCl}_3$  or the  $\delta$  128.39 resonance of  $\text{C}_6\text{D}_6$ . Infrared (IR) spectra were recorded as thin films or solutions in the indicated solvent. Optical rotations were measured on a Perkin-Elmer 341 digital polarimeter at ambient temperature. Mass spectra were obtained at the Laboratory for Biological Mass Spectrometry (Texas A&M University).

**5<sup>1</sup>**: To a solution of **4** (2.0 g, 11.9 mmol) in pyridine/CH<sub>2</sub>Cl<sub>2</sub> (1:2, 37.5 mL) at 0°C was added a solution of iodine (7.55 g, 29.7 mmol) in pyridine/CH<sub>2</sub>Cl<sub>2</sub> (1:1, 25.0 mL) slowly over a period of 3 h. Upon complete addition, DMAP (0.29 g, 2.38 mmol) was added and the ice bath was removed. After 3 h the reaction mixture was diluted with Et<sub>2</sub>O (500 mL), washed with water (100 mL), 1 N HCl (2 x 100 mL), water (100 mL), 20% Na<sub>2</sub>S<sub>2</sub>O<sub>3</sub> (100 mL), and brine. The organic layer was dried (Na<sub>2</sub>SO<sub>4</sub>) and concentrated *in vacuo*. The residue was subjected to flash chromatography (2:1, hexanes/EtOAc) to afford iodoenone **5** (2.2 g, 63%; 74% BRSM) as a pale yellow solid. The <sup>1</sup>H and <sup>13</sup>C data for the prepared compounds are fully consistent with those reported in the literature.<sup>1</sup>

**6**: To a suspension of NaH (544 mg, 13.6 mmol, 60% in mineral oil, washed with hexanes prior to use) in toluene (50.0 mL) were added NiCl<sub>2</sub>(PPh<sub>3</sub>)<sub>2</sub> (556 mg, 0.850 mmol), PPh<sub>3</sub> (446 mg, 1.70 mmol), zinc dust (333 mg, 5.10 mmol) and **5** (500 mg, 1.70 mmol) simultaneously. The mixture was immediately evacuated and flushed with Ar (4 x). The reaction mixture was placed in 88°C oil bath. After 4 h the oil bath was removed and the mixture was cooled to 0°C by ice bath. A solution of 1 N HCl (2 mL) was added to reaction mixture. The organic layer was separated and the aqueous layer was extracted with CH<sub>2</sub>Cl<sub>2</sub> (3 x 30 mL). The combined organic extracts were washed with brine (30 mL) and dried (Na<sub>2</sub>SO<sub>4</sub>). The solvent was concentrated *in vacuo* and the residue was subjected to flash chromatography (1:1, hexanes/EtOAc) to give dimer **6** (182 mg, 64%) as a white solid: [ $\alpha$ ]<sub>D</sub><sup>20</sup> -48.7° (c 1.0, CHCl<sub>3</sub>); IR (neat)  $\nu$  1684, 1230, 1060, 1040 cm<sup>-1</sup>; <sup>1</sup>H NMR (300 MHz, CDCl<sub>3</sub>)  $\delta$  6.46 (t, *J* = 2.1 Hz, 2H), 4.84-4.75 (m, 2H), 4.72-4.65 (m, 2H), 2.99-2.80 (m, 4H), 1.37 (s, 12H); <sup>13</sup>C NMR (75 MHz, CDCl<sub>3</sub>)  $\delta$  193.2, 142.6, 135.7, 109.6, 73.6, 71.0, 39.3, 27.7, 26.3; HRMS (ESI) calcd for C<sub>18</sub>H<sub>22</sub>O<sub>6</sub>Li [(M+Li)<sup>+</sup>] 341.1576, found 341.1582.

**7**: To a suspension of CuCN (429 mg, 4.78 mmol) in Et<sub>2</sub>O (8.0 mL) at -78°C was added vinyl lithium<sup>2</sup> (9.6 mL, 1.0 M in Et<sub>2</sub>O) slowly. After 10 min the reaction mixture was warmed to -40°C at which point THF (3.0 mL) was added, followed by addition of the solution of ketone **6** (160 mg, 0.478 mmol) in THF (5.0 mL) dropwise. After 20 min the mixture was warmed to -30°C and saturated NH<sub>4</sub>Cl solution was added. The cold bath was removed and the solution was extracted with CH<sub>2</sub>Cl<sub>2</sub> (3 x 15 mL). The combined organic layers were washed with brine (20 mL) and dried (Na<sub>2</sub>SO<sub>4</sub>). The solvent was removed *in vacuo* and the residue was subjected to

flash chromatography (hexanes/EtOAc, 2:1) to give ketone **7** (130 mg, 70%) as a pale yellow thick oil:  $[\alpha]_{\text{D}}^{20} -175.5^{\circ}$  (c 0.98,  $\text{CHCl}_3$ ); IR (neat)  $\nu$  1712, 1264, 1212, 1058  $\text{cm}^{-1}$ ;  $^1\text{H}$  NMR (300 MHz,  $\text{CDCl}_3$ )  $\delta$  5.52-5.37 (m, 2H), 5.31-5.19 (m, 4H), 4.37 (q,  $J = 7.2$  Hz, 2H), 4.04 (dd,  $J = 7.2$ , 9.6 Hz, 2H), 3.05 (dd,  $J = 9.6$ , 21.6 Hz, 2H), 2.75 (d,  $J = 7.2$  Hz, 4H), 2.39 (d,  $J = 12.0$  Hz, 2H), 1.48 (s, 6H), 1.32 (s, 6H);  $^{13}\text{C}$  NMR (75 MHz,  $\text{CDCl}_3$ )  $\delta$  208.8, 137.0, 120.1, 109.2, 77.8, 71.1, 48.3, 46.5, 43.9, 27.3, 24.6; HRMS (ESI) calcd for  $\text{C}_{22}\text{H}_{30}\text{O}_6\text{Li}$   $[(\text{M}+\text{Li})^+]$  397.2202, found 397.2200.

**8:** A mixture of **7** (50 mg, 0.13 mmol) and 10% Pd/C (20 mg) in EtOAc (10.0 mL) was applied to the atmosphere of  $\text{H}_2$ . After 2 h the suspension was filtered through the celite pad. The solvent was concentrated *in vacuo* and the residue was subjected to flash chromatography (2:1, hexanes/EtOAc) to give ketone **8** (43 mg, 85%) as a colorless thick oil:  $[\alpha]_{\text{D}}^{20} -73.4^{\circ}$  (c 2.23,  $\text{CHCl}_3$ ); IR (neat)  $\nu$  1711, 1378, 1244, 1168, 1052  $\text{cm}^{-1}$ ;  $^1\text{H}$  NMR (400 MHz,  $\text{CDCl}_3$ )  $\delta$  4.42 (q,  $J = 6.4$  Hz, 2H), 4.15 (dd,  $J = 6.4$ , 7.6 Hz, 2H), 2.69 (dq,  $J = 6.4$ , 15.2 Hz, 4H), 2.58-2.48 (m, 2H), 2.38 (d,  $J = 9.2$  Hz, 2H), 1.79-1.67 (m, 2H), 1.50-1.38 (m, 2H), 1.43 (s, 6H), 1.32 (s, 6H), 0.94 (t,  $J = 7.2$  Hz, 6H);  $^{13}\text{C}$  NMR (100 MHz,  $\text{CDCl}_3$ )  $\delta$  209.6, 109.3, 76.8, 73.2, 48.2, 43.9, 39.6, 27.5, 25.3, 23.5, 10.3; HRMS (ESI) calcd for  $\text{C}_{22}\text{H}_{34}\text{O}_6\text{Li}$   $[(\text{M}+\text{Li})^+]$  401.2515, found 401.2527.

**9:** To a solution of ketone **7** (50 mg, 0.13 mmol) in benzene (10 mL) at  $0^{\circ}\text{C}$  was added DBU (98 mg, 0.65 mmol) dropwise. After 24 h the reaction mixture was diluted with EtOAc (60 mL), washed with 1 N HCl (30 mL), water, and brine. The organic layer was dried ( $\text{Na}_2\text{SO}_4$ ). The solvent was removed *in vacuo*, and the residue was subjected to flash chromatography (EtOAc) to give enone **9** (19 mg, 56%) as a colorless thick oil:  $[\alpha]_{\text{D}}^{20} -162.8^{\circ}$  (c 0.65,  $\text{CHCl}_3$ ); IR (neat)  $\nu$  3408 (br), 1667, 1056, 924  $\text{cm}^{-1}$ ;  $^1\text{H}$  NMR (400 MHz,  $\text{CDCl}_3$ )  $\delta$  6.91 (d,  $J = 10.8$  Hz, 1H), 6.89 (d,  $J = 10.0$  Hz, 1H), 6.00 (dd,  $J = 2.0$ , 10.0 Hz, 1H), 5.94 (dd,  $J = 2.0$ , 10.4 Hz, 1H), 5.61-5.48 (m, 2H), 5.40-5.20 (m, 4H), 4.32 (d,  $J = 9.2$  Hz, 1H), 4.25 (d,  $J = 9.6$  Hz, 1H), 3.59 (d,  $J = 12.4$  Hz, 1H), 3.33 (q,  $J = 10.0$  Hz, 1H), 2.74 (q,  $J = 10.0$  Hz, 1H), 2.44 (d,  $J = 12.0$  Hz, 1H), 2.16 (s, 1H), 2.06 (s, 1H);  $^{13}\text{C}$  NMR (100 MHz,  $\text{CDCl}_3$ )  $\delta$  197.8, 150.8, 150.4, 137.0, 136.9, 128.9, 128.2, 122.2, 121.3, 70.4, 69.4, 54.8, 51.6, 48.2, 46.2; HRMS (ESI) calcd for  $\text{C}_{16}\text{H}_{19}\text{O}_4$   $[(\text{M}+\text{H})^+]$  275.1283, found 275.1288.

**10:** To a solution of ketone **8** (34 mg, 0.086 mmol) in THF (10 mL) at 0°C was added freshly prepared aqueous solution of NaOH (0.20 mL, 0.5 M, 0.10 mmol) dropwise. The ice bath was removed. After 24 h water (20 mL) was added and the mixture was extracted with EtOAc (3 x 25 mL). The combined organic layers were washed with brine and dried (Na<sub>2</sub>SO<sub>4</sub>). The solvent was removed *in vacuo* and the residue was subjected to flash chromatography (1:1, hexanes/EtOAc) to give ketone **10** (22 mg, 76%).

Ketone **10** was also prepared by the treatment of **8** with DBU: To a solution of ketone **8** (10 mg, 0.025 mmol) in benzene (3.0 mL) at 0°C was added the solution of DBU (8.5 mg, 0.056 mmol) in benzene (1.0 mL) dropwise. After 4 h the reaction mixture was directly subjected to flash chromatography (1:1, hexanes/EtOAc) to give ketone **10** (4.2 mg, 49%) as a thick oil:  $[\alpha]_D^{20}$  -12.1° (c 1.20, CHCl<sub>3</sub>); IR (neat)  $\nu$  1717, 1177, 1094, 1003 cm<sup>-1</sup>; <sup>1</sup>H NMR (400 MHz, CDCl<sub>3</sub>)  $\delta$  4.63 (quint, *J* = 2.4 Hz, 1H), 4.35 (d, *J* = 6.0 Hz, 1H), 4.28 (dt, *J* = 1.6, 4.8 Hz, 1H), 3.84 (dd, *J* = 4.8, 9.2 Hz, 1H), 2.79 (dd, *J* = 3.2, 19.2 Hz, 1H), 2.74 (quint, *J* = 2.4 Hz, 1H), 2.39 (dd, *J* = 1.6, 19.2 Hz, 1H), 2.32 (dd, *J* = 1.6, 16.0 Hz, 1H), 2.18 (t, *J* = 8.8 Hz, 1H), 2.13 (dd, *J* = 4.8, 15.6 Hz, 1H), 1.80-1.66 (m, 3H), 1.65-1.55 (m, 1H), 1.43 (s, 3H), 1.30 (s, 3H), 1.37-1.27 (m, 1H), 1.17-1.05 (m, 1H), 0.92 (t, *J* = 7.6 Hz, 3H), 0.81 (t, *J* = 7.6 Hz, 3H); <sup>13</sup>C NMR (100 MHz, CDCl<sub>3</sub>)  $\delta$  211.1, 108.6, 106.4, 75.8, 73.6, 73.4, 72.5, 50.6, 44.9, 43.6, 41.0, 38.5, 33.3, 28.6, 26.2, 23.6, 17.7, 12.0, 7.5; HRMS (ESI) calcd for C<sub>19</sub>H<sub>28</sub>O<sub>5</sub>Li [(M+Li)<sup>+</sup>] 343.2097, found 343.2092.

**11:** To a solution of enone **6** (200 mg, 0.598 mmol) and allyltributyltin (792 mg, 2.39 mmol) in CH<sub>2</sub>Cl<sub>2</sub> (20.0 mL) at -78°C was added TBSOTf (632 mg, 2.39 mmol) dropwise. After 4 h the 5% aqueous solution of NaHCO<sub>3</sub> was added and the cold bath was removed. The organic layer was separated and the aqueous layer was extracted with CH<sub>2</sub>Cl<sub>2</sub> (3 x 30 mL). The combined organic extracts were washed with brine and dried (Na<sub>2</sub>SO<sub>4</sub>). The solvent was concentrated *in vacuo* and the residue was subjected to flash chromatography (10:1, hexanes/EtOAc) to give silylenol ether **11** (375 mg, 97%) as colorless, thick oil:  $[\alpha]_D^{20}$  +30.6° (c 1.06, CHCl<sub>3</sub>); IR (neat)  $\nu$  2931, 1373, 1246, 1200, 1043, 835, 777 cm<sup>-1</sup>; <sup>1</sup>H NMR (400 MHz, CDCl<sub>3</sub>)  $\delta$  5.84-5.71 (m, 2H), 5.02-4.94 (m, 4H), 4.50-4.43 (m, 2H), 4.25 (d, *J* = 6.8 Hz, 2H), 2.44 (dd, *J* = 4.8, 16.0 Hz, 4H), 2.25 (d, *J* = 14.8 Hz, 4H), 1.88 (q, *J* = 11.6 Hz, 2H), 1.34 (s, 6H), 1.26 (s, 6H), 0.86 (s, 18H), 0.14 (s, 6H),

0.12 (s, 6H);  $^{13}\text{C}$  NMR (75 MHz,  $\text{CDCl}_3$ )  $\delta$  142.0, 137.8, 115.8, 112.1, 107.3, 74.6, 74.0, 40.1, 34.6, 33.5, 26.4, 26.1, 24.2, 18.1, -2.5, -3.4; HRMS (ESI) calcd for  $\text{C}_{36}\text{H}_{62}\text{O}_6\text{Si}_2\text{Li}$   $[(\text{M}+\text{Li})^+]$  653.4245, found 653.4222.

**12:** A mixture of **11** (430 mg, 0.665 mmol) and 10% Pd/C (150 mg) in EtOAc (30.0 mL) was applied to the atmosphere of  $\text{H}_2$ . After 2 h the suspension was filtered through celite pad. The solvent was removed *in vacuo* and the residue was subjected to flash chromatography (10:1, hexanes/EtOAc) to give silylenol ether **12** (420 mg, 97%) as a white solid:  $[\alpha]_{\text{D}}^{20} +30.4^\circ$  (c 1.04,  $\text{CHCl}_3$ ); IR (neat)  $\nu$  1370, 1245, 1203, 1046, 901, 773  $\text{cm}^{-1}$ ;  $^1\text{H}$  NMR (400 MHz,  $\text{CDCl}_3$ )  $\delta$  4.53-4.41 (m, 2H), 4.33-4.20 (m, 2H), 2.44 (dd,  $J = 5.2, 16.8$  Hz, 2H), 2.35-2.28 (m, 2H), 2.20 (dd,  $J = 1.6, 16.4$  Hz, 2H), 1.47-1.21 (m, 6H), 1.34 (s, 6H), 1.28 (s, 6H), 1.17-1.07 (m, 2H), 0.83 (t,  $J = 6.8$  Hz, 6H), 0.85 (s, 18H), 0.13 (s, 6H), 0.12 (s, 6H);  $^{13}\text{C}$  NMR (75 MHz,  $\text{CDCl}_3$ )  $\delta$  141.0, 113.0, 107.1, 75.4, 74.1, 40.3, 33.4, 32.7, 26.2, 26.1, 24.1, 21.5, 18.1, 14.3, -2.4, -3.5; HRMS (ESI) calcd for  $\text{C}_{36}\text{H}_{66}\text{O}_6\text{Si}_2\text{Na}$   $[(\text{M}+\text{Na})^+]$  673.4290, found 673.4283.

**14:** To a solution of enol ether **12** (200 mg, 0.31 mmol) in THF (16 mL) at  $0^\circ\text{C}$  was added TBAF (0.92 mL, 1.0 M in THF) dropwise. After 1 h  $\text{H}_2\text{O}$  (15 mL) was added to the reaction mixture. The organic layer was separated and the aqueous layer was extracted with EtOAc (5x 25 mL). The combined organic layers were washed with brine (30 mL) and dried ( $\text{Na}_2\text{SO}_4$ ). The solvent was removed *in vacuo* and the residue was subjected to flash chromatography (EtOAc) to give diol **13** (62 mg) which was taken to the next step.

To a solution of diol **13** (62 mg, 0.20 mmol) and pyridine (80 mg, 1.0 mmol) in  $\text{CH}_2\text{Cl}_2$  (12.0 mL) at  $0^\circ\text{C}$  were added  $\text{Ac}_2\text{O}$  (103 mg, 1.0 mmol), DMAP (cat). The ice bath was removed. After 2 h the solution of 1 N HCl (20 mL) was added to the reaction mixture. The organic layer was separated and the aqueous layer was extracted with  $\text{CH}_2\text{Cl}_2$  (3 x 25 mL). The combined organic layers were dried ( $\text{Na}_2\text{SO}_4$ ). The solvent was removed *in vacuo* and the residue was subjected to flash chromatography (3:1, hexanes/EtOAc) to give bis-acetate **14** (59 mg, 50% for two steps) as a thick oil:  $[\alpha]_{\text{D}}^{20} -141.4^\circ$  (c 0.73,  $\text{CHCl}_3$ ); IR (neat)  $\nu$  1739, 1674, 1231, 1028  $\text{cm}^{-1}$ ;  $^1\text{H}$  NMR (400 MHz,  $\text{CDCl}_3$ )  $\delta$  6.67 (dd,  $J = 2.4, 10.4$  Hz, 2H), 6.00 (dd,  $J = 2.4, 10.4$  Hz, 2H), 5.51 (td,  $J = 2.4, 9.6$  Hz, 2H), 2.93-2.82 (m, 2H), 2.73-2.62 (m, 2H), 2.12 (s, 6H), 1.51-1.40 (m,

2H), 1.36-1.18 (m, 6H), 0.86 (t,  $J = 6.8$  Hz, 6H);  $^{13}\text{C}$  NMR (75 MHz,  $\text{CDCl}_3$ )  $\delta$  198.8, 170.5, 146.6, 129.8, 71.6, 47.9, 42.3, 31.6, 21.0, 18.8, 14.4; HRMS (ESI) calcd for  $\text{C}_{22}\text{H}_{30}\text{O}_6\text{Li}$   $[(\text{M}+\text{Li})^+]$  397.2202, found 397.2195.

**15:** To a solution of enone **14** (59 mg, 0.15 mmol) in pyridine- $\text{CH}_2\text{Cl}_2$  (1:2, 3.0 mL) at RT was added the solution of iodine (192 mg, 0.756 mmol) in pyridine- $\text{CH}_2\text{Cl}_2$  (1:1, 4.0 mL) dropwise. Upon complete addition, DMAP (cat.) was added. After 24 h the reaction mixture was diluted with  $\text{Et}_2\text{O}$  (100 mL), washed with water (30 mL), 1 N HCl (2 x 30 mL), water (30 mL), 20%  $\text{Na}_2\text{S}_2\text{O}_3$  (30 mL), and brine (30 mL). The organic layer was dried ( $\text{Na}_2\text{SO}_4$ ) and concentrated *in vacuo*. The residue was subjected to flash chromatography (3:1, hexanes/ $\text{EtOAc}$ ) to afford iodoenone **15** (61 mg, 63%) as white solids:  $[\alpha]_{\text{D}}^{20} -140.2^\circ$  (c 1.29,  $\text{CHCl}_3$ ); IR (neat)  $\nu$  1739, 1686, 1227, 1031, 737  $\text{cm}^{-1}$ ;  $^1\text{H}$  NMR (400 MHz,  $\text{CDCl}_3$ )  $\delta$  7.44 (d,  $J = 2.4$  Hz, 2H), 5.45 (dd,  $J = 2.4, 9.6$  Hz, 2H), 3.01-2.86 (m, 2H), 2.85-2.71 (m, 2H), 2.12 (s, 6H), 1.52-1.42 (m, 2H), 1.34-1.13 (m, 6H), 0.86 (t,  $J = 6.8$  Hz, 6H);  $^{13}\text{C}$  NMR (75 MHz,  $\text{CDCl}_3$ )  $\delta$  191.8, 170.3, 155.3, 104.3, 72.9, 46.8, 42.4, 31.1, 20.8, 18.4, 14.3; HRMS (ESI) calcd for  $\text{C}_{22}\text{H}_{28}\text{I}_2\text{O}_6\text{Li}$   $[(\text{M}+\text{Li})^+]$  649.0135, found 649.0105.

**17:** To a solution of **11** (100 mg, 0.15 mmol) in  $t\text{-BuOH}/\text{H}_2\text{O}$  (2:1, 22.5 mL) were added  $\text{OsO}_4$  (0.002 mg, 0.0093 mmol), NMO (42.0 mg, 0.31 mmol). After 24 h the solution was transferred to the mixture of  $\text{Na}_2\text{SO}_3$  (20 %) and ethyl acetate (1:1, 20 mL). The organic layer was separated and the aqueous layer was extracted with  $\text{EtOAc}$  (4 x 20 mL). The organic layers were combined and dried ( $\text{MgSO}_4$ ). The solvent was concentrated *in vacuo*.

The crude residue was dissolved in dichloroethane (10 mL) and  $\text{Pb}(\text{OAc})_4$  (0.14 g, 0.32 mmol) was added. After 30 min the solution was diluted with  $\text{Et}_2\text{O}$  (20 mL). The organic layer was washed with  $\text{NaHCO}_3$  (15 mL), brine (15 mL), dried ( $\text{MgSO}_4$ ). The solvent was concentrated *in vacuo* to provide the crude residue - aldehyde **16** that was taken to the next step.

To a solution of **16** in  $\text{EtOH}$  (10 mL) at  $0^\circ\text{C}$  was added  $\text{NaBH}_4$  (12 mg, 0.31 mmol). After 30 min at  $0^\circ\text{C}$   $\text{MeOH}$  was added to the reaction mixture and the ice bath was removed. The solvent was evaporated *in vacuo*. The residue was purified by flash chromatography (1:1, hexanes/ $\text{EtOAc}$ ) to provide the alcohol **17** (76 mg, 75% over three steps) as a thick oil:  $[\alpha]_{\text{D}}^{20} -18.6^\circ$  (c 0.01,  $\text{CHCl}_3$ );

IR (neat)  $\nu$  3424, 2930, 2856, 1652, 1464  $\text{cm}^{-1}$ ;  $^1\text{H}$  NMR (400 MHz,  $\text{CDCl}_3$ )  $\delta$  4.50 (t,  $J$  = 6.1 Hz, 2 H), 4.30 (d,  $J$  = 5.5 Hz, 2 H), 3.79 – 3.65 (m, 2 H), 3.62 – 3.51 (m, 2 H), 3.07 – 2.96 (m, 2 H), 2.94 – 2.86 (m, 2 H), 2.55 (dd,  $J$  = 16.8 Hz,  $J$  = 6 Hz, 2 H), 2.29 (d,  $J$  = 16.8 Hz, 2 H), 1.60 – 1.50 (m, 4 H), 1.49 (s, 6 H), 1.36 (s, 6 H), 0.88 (s, 18 H), 0.21 (s, 6 H), 0.19 (s, 6 H);  $^{13}\text{C}$  NMR (150 MHz,  $\text{CDCl}_3$ )  $\delta$  142.8, 110.8, 107.6, 77.6, 73.9, 59.7, 34.5, 34.4, 33.7, 26.1, 25.9, 24.0, 18.0, -2.2, -3.1; HRMS (ESI) calcd for  $\text{C}_{34}\text{H}_{63}\text{O}_8\text{Si}_2$   $[(\text{M}+\text{H})^+]$  655.4062, found 655.4037.

**18:** To a solution of **17** (200 mg, 0.30 mmol) in dichloromethane (10 mL) at  $0^\circ\text{C}$  was added  $\text{Et}_3\text{N}$  (106 mg, 1.05 mmol),  $\text{MsCl}$  (0.90, 100 mg). After 30 min  $\text{H}_2\text{O}$  (2 mL) was added. The ice bath was removed. The aqueous layer was extracted with dichloromethane (3 x 15 mL). The combined organic layers were dried ( $\text{MgSO}_4$ ). The solvent was concentrated *in vacuo*. The residue was purified by flash chromatography (1:1, hexanes/ $\text{EtOAc}$ ) to provide the title compound **18** (210 mg, 86 %) as a thick oil:  $[\alpha]_{\text{D}}^{20}$  -14.6° (0.01,  $\text{CHCl}_3$ ); IR (neat)  $\nu$  2925, 2851, 1356, 1259  $\text{cm}^{-1}$ ;  $^1\text{H}$  NMR (400 MHz,  $\text{CDCl}_3$ )  $\delta$  4.47 – 4.33 (m, 4 H), 4.29 (ddd,  $J$  = 16.9 Hz,  $J$  = 9.6 Hz,  $J$  = 7.24 Hz, 2 H), 4.22 – 4.08 (m, 2 H), 2.97 (s, 6 H), 2.62 – 2.43 (m, 2 H), 2.38 – 2.23 (m, 4 H), 2.07 – 1.96 (m, 2 H), 1.8 – 1.65 (m, 2 H), 1.41 (s, 6 H), 1.30 (s, 6 H), 0.87 (s, 18 H), 0.14 (s, 6 H), 0.12 (s, 6 H);  $^{13}\text{C}$  NMR (100 MHz,  $\text{CDCl}_3$ )  $\delta$  143.6, 110.8, 108.1, 80.1, 73.4, 69.2, 37.8, 37.2, 34.0, 30.6, 26.7, 25.8, 24.2, 17.9, -2.6, -3.4; HRMS (ESI) calcd for  $\text{C}_{36}\text{H}_{66}\text{O}_{12}\text{Si}_2\text{S}_2\text{Na}$   $[(\text{M}+\text{Na})^+]$  833.3432, found 833.3422.

**19:** To a solution of **18** (193 mg, 0.24 mmol) in acetone (39 mL) were added  $\text{NaI}$  (572 mg, 3.82 mmol),  $\text{NaHCO}_3$  (320 mg, 3.82 mmol). The reaction mixture was placed in  $50^\circ\text{C}$  oil bath. After 24 h the oil bath was removed. The mixture was diluted with dichloromethane (50 mL) and washed with  $\text{H}_2\text{O}$  (20 mL) and brine (20 mL). The organic layer was dried ( $\text{MgSO}_4$ ). The solvent was concentrated *in vacuo*. The residue was purified by flash chromatography (9:1, hexanes/ $\text{EtOAc}$ ) to provide the title compound **19** (142 mg, 67 %) as a thick, yellow oil:  $[\alpha]_{\text{D}}^{20}$  +1.74° (0.01,  $\text{CHCl}_3$ ); IR (neat):  $\nu$  2954, 2922, 2852, 1658, 1462  $\text{cm}^{-1}$ ;  $^1\text{H}$  NMR (400 MHz,  $\text{CDCl}_3$ ):  $\delta$  5.02 – 4.42 (m, 2 H), 4.28 – 4.18 (m, 2 H), 3.33 – 3.05 (m, 4 H), 2.53 – 2.33 (m, 4 H), 2.30 (dd,  $J$  = 16.4 Hz,  $J$  = 2.4 Hz, 2 H), 2.12 – 1.99 (m, 2 H), 1.91 – 1.78 (m, 2 H), 1.41 (s, 6 H),

1.32 (s, 6 H), 0.90 (s, 18 H), 0.19 (s, 6 H), 0.18 (s, 6 H);  $^{13}\text{C}$  NMR (100 MHz,  $\text{CDCl}_3$ )  $\delta$  142.8, 110.7, 107.5, 75.5, 73.6, 42.3, 36.2, 33.4, 26.5, 26.0, 25.6, 18.0, 4.4, -2.3, -3.4; HRMS (ESI) calcd for  $\text{C}_{34}\text{H}_{61}\text{I}_2\text{O}_6\text{Si}_2$  [(M+H)] 875.2096, found 875.2088.

**20:** To a solution of **19** (112 mg, 0.13 mmol) in EtOH (54 mL) were added  $\text{Et}_3\text{N}$  (28 mg, 0.30 mmol), 5 % Pd/C (60 mg). The reaction mixture was applied to the atmosphere of  $\text{H}_2$  and placed in 40°C oil bath. After 24 h the oil bath was removed. The solution was filtrated through the celite pad. The solvent was concentrated *in vacuo*. The residue was purified by flash chromatography (9:1, hexanes/ EtOAc) to provide the title compound **20** (81 mg, 95 %) as a white solid:  $[\alpha]_{\text{D}}^{20} +34.0^\circ$  (c 0.03,  $\text{CHCl}_3$ ); IR (neat)  $\nu$  2956, 2927, 2857, 1376, 1253  $\text{cm}^{-1}$ ;  $^1\text{H}$  NMR (400 MHz,  $\text{CDCl}_3$ )  $\delta$  4.55 - 4.40 (m, 2 H), 4.35 - 4.23 (m, 2H), 2.44 (dd,  $J = 5.2$  Hz,  $J = 16.4$  Hz, 2 H), 2.29 – 2.20 (m, 4 H), 1.54 – 1.43 (m, 4 H), 1.37 (s, 6 H), 1.31 (s, 6H), 0.95 (t,  $J = 7.36$ , 6 H), 0.88 (s, 18 H), 0.15 (s, 6 H), 0.14 (s, 6 H);  $^{13}\text{C}$  NMR (100 MHz,  $\text{CDCl}_3$ )  $\delta$  141.1, 113.1, 107.2, 75.2, 74.2, 42.1, 33.4, 26.2, 26.0, 24.1, 23.1, 18.1, 12.8, -2.5, -3.5; HRMS (ESI) calcd for  $\text{C}_{34}\text{H}_{63}\text{O}_6\text{Si}_2$  [(M+H) $^+$ ] 623.4160, found 623.4163.

**21:** To a solution of **20** (18 mg, 0.03 mmol) in THF (1.8 mL) at 0°C was added TBAF (0.09 mmol, 1.0 M in THF) dropwise. After 30 min  $\text{H}_2\text{O}$  (1 mL) was added to the reaction mixture. The organic layer was separated and the aqueous layer was extracted with EtOAc (4 x 5 mL). The combined organic layers were dried ( $\text{MgSO}_4$ ). The solvent was removed *in vacuo*. The residue was purified by flash chromatography (EtOAc) to give diol **21** (5.4 mg) which was taken to the next step.

**22:** To a solution of **21** (8.7 mg, 0.03 mmol) and pyridine (12.3 mg, 0.16 mmol) in  $\text{CH}_2\text{Cl}_2$  (3 mL) at 0°C was added  $\text{Ac}_2\text{O}$  (16 mg, 0.16 mmol), DMAP (cat). The ice bath was removed. After 30 min the reaction mixture was cooled to 0°C by ice bath and the solution of 1 N HCl (0.2 mL) was added. The organic layer was separated and the aqueous layer was extracted with  $\text{CH}_2\text{Cl}_2$  (3 x 5 mL). The combined organic layers were dried ( $\text{MgSO}_4$ ). The solvent was concentrated *in vacuo* and the residue was purified by flash chromatography (2:1, hexanes/EtOAc) to provide enone **22** (8.6 mg, 76 %) as a white solid:  $[\alpha]_{\text{D}}^{20} -30.7^\circ$  (0.01,  $\text{CHCl}_3$ ); IR (neat)  $\nu$  1738, 1675, 1371, 1231  $\text{cm}^{-1}$ ;  $^1\text{H}$  NMR (400 MHz,  $\text{CDCl}_3$ )  $\delta$  6.71 (dd,  $J = 2.0$  Hz,  $J = 10.4$ , 2H), 6.02 (dd,  $J =$



2.4, 10.4 Hz, 2H), 5.58 (d,  $J = 10$  Hz, 2 H), 2.94 (s, 2 H), 2.73 (d,  $J = 9.2$  Hz, 2 H) 2.14 (s, 6 H) 1.63-1.58 (m, 2H), 1.44-1.41 (m, 2H), 0.91 (t,  $J = 7.6$  Hz, 6H);  $^{13}\text{C}$  NMR (100 MHz,  $\text{CDCl}_3$ )  $\delta$  198.6, 170.5, 146.9, 129.8, 71.0, 46.8, 43.1, 21.2, 20.9, 9.5; HRMS (ESI) calcd for  $\text{C}_{20}\text{H}_{26}\text{O}_6\text{Na}$   $[(\text{M}+\text{Na})^+]$  385.1627, found 385.1635.

**23:** To a solution of enone **22** (13 mg, 0.03 mmol) in pyridine- $\text{CH}_2\text{Cl}_2$  (1:2, 0.75 mL) at RT was added the solution of iodine (45 mg, 0.18 mmol) in pyridine- $\text{CH}_2\text{Cl}_2$  (1:1, 0.65 mL) dropwise. Upon complete addition, DMAP (cat.) was added. After 24 h the solution was diluted with  $\text{Et}_2\text{O}$  (10 mL), washed with water (5 mL), 1 N HCl (5 mL), water (10 mL), 20%  $\text{Na}_2\text{S}_2\text{O}_3$  (2 x 5 mL), and brine (5 mL). The organic layer was dried ( $\text{MgSO}_4$ ) and the solvent was concentrated *in vacuo*. The residue was subjected to flash chromatography (3:1, hexanes/ $\text{EtOAc}$ ) to afford iodoenone **23** (14 mg, 73 %) as a white solid:  $[\alpha]_{\text{D}}^{20}$  -22.2° (c 0.01,  $\text{CHCl}_3$ ); IR (neat)  $\nu$  2919, 2850, 1739, 1686, 1462  $\text{cm}^{-1}$ ;  $^1\text{H}$  NMR (400 MHz,  $\text{CDCl}_3$ )  $\delta$  7.47 (d,  $J = 2.28$ , 2 H), 5.51 (dd,  $J = 2.28$ ,  $J = 9.96$ , 2 H), 3.09 - 2.97 (m, 2 H), 2.84 - 2.76 (m, 2 H), 2.14 (s, 6 H), 1.70 - 1.57 (m, 4 H), 1.46 - 1.35 (m, 4 H), 0.89 (t,  $J = 10.0$  Hz, 6 H);  $^{13}\text{C}$  NMR (100 MHz,  $\text{CDCl}_3$ )  $\delta$  191.9, 170.3, 155.5, 104.3, 72.3, 45.9, 43.4, 29.7, 20.8, 9.2; HRMS (ESI) calcd for  $\text{C}_{20}\text{H}_{24}\text{O}_6\text{I}_2\text{Na}$   $[(\text{M}+\text{Na})^+]$  636.9560, found 636.9591.

**24:** To a solution of silylenol ether **11** (150 mg, 0.23 mmol) in  $\text{CH}_3\text{OH}$  (8.0 mL) at 0°C was added PTSA (8.8 mg, 0.046 mmol). The ice bath was removed. After 6 h the mixture was directly subjected to flash chromatography (2:1, hexanes/ $\text{EtOAc}$ ) to give intermediate tetrol **11a** (104 mg) as a thick oil.

To a solution of tetrol **11a** (104 mg, 0.18 mmol) and pyridine (145 mg, 1.83 mmol) in  $\text{CH}_2\text{Cl}_2$  (8.0 mL) at 0°C were added  $\text{Ac}_2\text{O}$  (187 mg, 1.83 mmol), DMAP (5 mg). The ice bath was removed. After 2.5 h the solution of 1 N HCl (25 mL) was added to reaction mixture. The organic layer was separated and the aqueous layer was extracted with  $\text{EtOAc}$  (3 x 25 mL). The combined organic layers were washed with 1 N HCl (25 mL), saturated  $\text{NaHCO}_3$  (25 mL), brine (20 mL) and dried ( $\text{Na}_2\text{SO}_4$ ). The solvent was removed *in vacuo* and the residue was subjected to flash chromatography (3:1, hexanes/ $\text{EtOAc}$ ) to give silylenol ether **24** (115 mg, 74% for two steps) as a thick oil:  $[\alpha]_{\text{D}}^{20}$  -21.1° (c 0.35,  $\text{CHCl}_3$ ); IR (neat)  $\nu$  1744, 1229, 1037, 837  $\text{cm}^{-1}$ ;  $^1\text{H}$  NMR (300

MHz, CDCl<sub>3</sub>)  $\delta$  5.88-5.68 (m, 2H), 5.19-4.93 (m, 8H), 2.40 (d,  $J$  = 7.2 Hz, 4H), 2.37-2.18 (m, 4H), 2.01 (s, 6H), 1.98 (s, 6H), 1.95-1.81 (m, 2H), 0.87 (s, 18H), 0.15 (s, 6H), 0.06 (s, 6H); <sup>13</sup>C NMR (75 MHz, CDCl<sub>3</sub>)  $\delta$  170.3, 170.2, 142.5, 136.3, 116.4, 110.1, 71.0, 67.2, 39.3, 36.5, 32.6, 25.9, 21.0, 18.0, -2.9, -4.2; HRMS (ESI) calcd for C<sub>38</sub>H<sub>62</sub>O<sub>10</sub>Si<sub>2</sub>Na [(M+Na)<sup>+</sup>] 757.3774, found 757.3772.

**25:** To a suspension of silylenol ether **24** (40 mg, 0.056 mmol) in CH<sub>3</sub>CN-H<sub>2</sub>O (5:1, 6.0 mL) at 0°C was added CAN (90 mg, 0.16 mmol). The ice bath was removed. After 6 h H<sub>2</sub>O was added to reaction mixture. The organic layer was separated. The aqueous layer was extracted with EtOAc (3 x 30 mL). The combined organic layers were washed with brine and dried (Na<sub>2</sub>SO<sub>4</sub>). The solvent was removed *in vacuo* and the residue was subjected to flash chromatography (1:1, hexanes/EtOAc) to give diketone **25** (13 mg, 98%) as colorless, thick oil:  $[\alpha]_D^{20}$  +46.5° (c 0.77, CHCl<sub>3</sub>); IR (neat)  $\nu$  1744, 1691 (shoulder), 1230, 1038 cm<sup>-1</sup>; <sup>1</sup>H NMR (500 MHz, CDCl<sub>3</sub>)  $\delta$  5.85-5.74 (m, 2H), 5.42-5.34 (m, 4H), 5.18-5.08 (m, 4H), 3.29-3.23 (m, 2H), 2.85 (dd,  $J$  = 5.5, 14.0 Hz, 2H), 2.75-2.66 (m, 2H), 2.27 (td,  $J$  = 7.0, 14.0 Hz, 2H), 2.21-2.12 (m, 2H), 2.10 (s, 6H), 2.02 (s, 6H); <sup>13</sup>C NMR (75 MHz, CDCl<sub>3</sub>)  $\delta$  199.2, 169.6, 169.2, 140.8, 133.0, 118.6, 70.6, 66.5, 44.6, 42.5, 36.6, 21.0, 20.8; HRMS (ESI) calcd for C<sub>26</sub>H<sub>32</sub>O<sub>10</sub>Li [(M+Li)<sup>+</sup>] 511.2156, found 511.2140.

## REFERENCES

- (1) Barros, M. T.; Matias, P. M.; Maycock, C. D.; Ventura, M. R. *Org. Lett.* **2003**, 5, 4321.
- (2) Suzuki, T.; Suzuki, S. T.; Yamada, I.; Koashi, Y.; Yamada, K. and Chida, N. *J. Org. Chem.* **2002**, 67, 2874.
